# Supplementary material for: Surface molecularly imprinted polymers-based electrochemical sensor for bovine hemoglobin recognition
Source: Royal Society of Chemistry journal article supplement (doi:10.1039/c3an01435e), 2013-01-01
Supplement: c3an01435e.pdf [file c3an01435e.pdf]

supplementary materials

## Surface Molecularly Imprinted Polymers based Electrochemical Sensor for Bovine Hemoglobin Recognition

Lu Li, Lingling Yang, Zonglan Xing, Xiaojing Lu, and Xianwen Kan\*

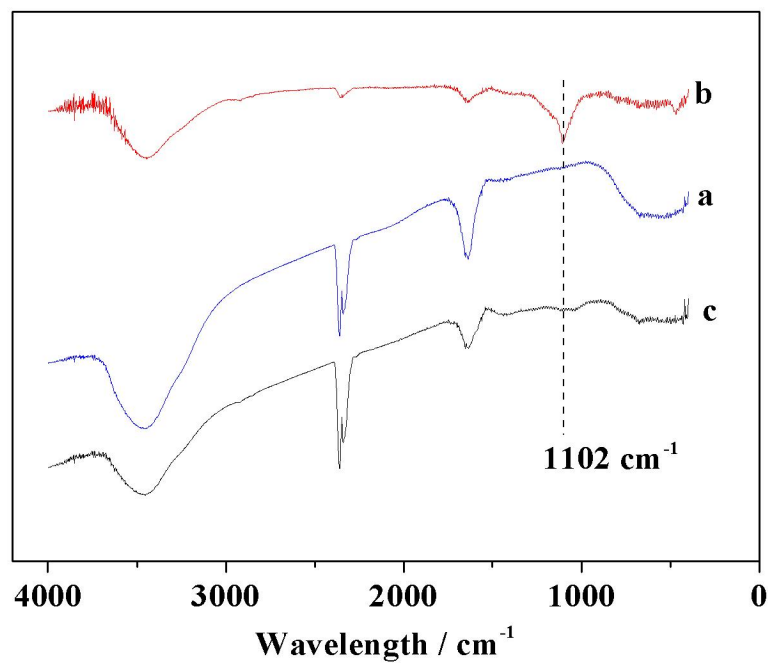

Fig. S1 FTIR spectra. Pure pPY film (a), MIPs film before (b) and after (c) the etch of silica microspheres from the polymer film.

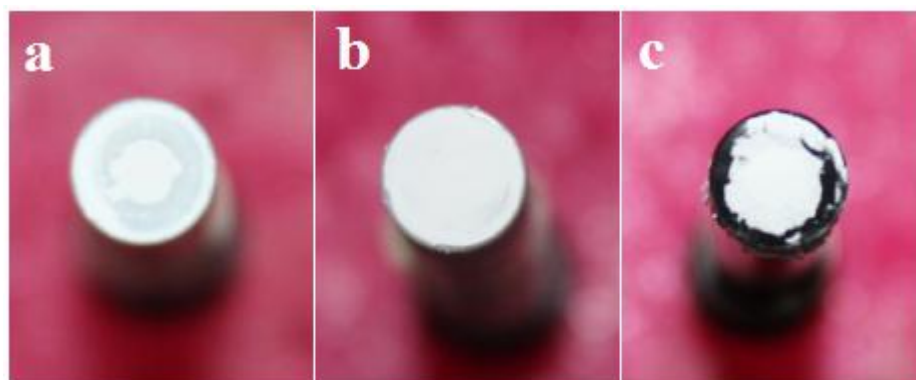

Fig. S2 Photographs of electrodes modified with different amount of SiO<sub>2</sub>-CHO.

0.636 mg (a), 1.06 mg (b), and 1.98 mg (c).

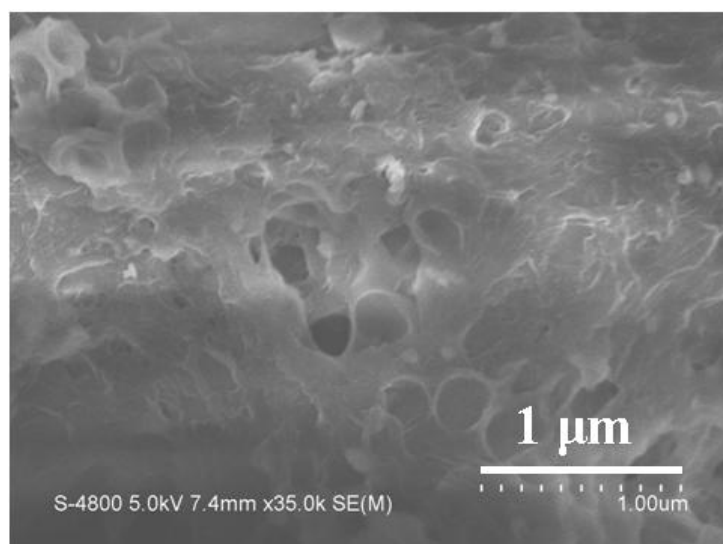

Fig. S3 SEM image of MMIPs/AuE prepared by electropolymerization of 40 cycles.

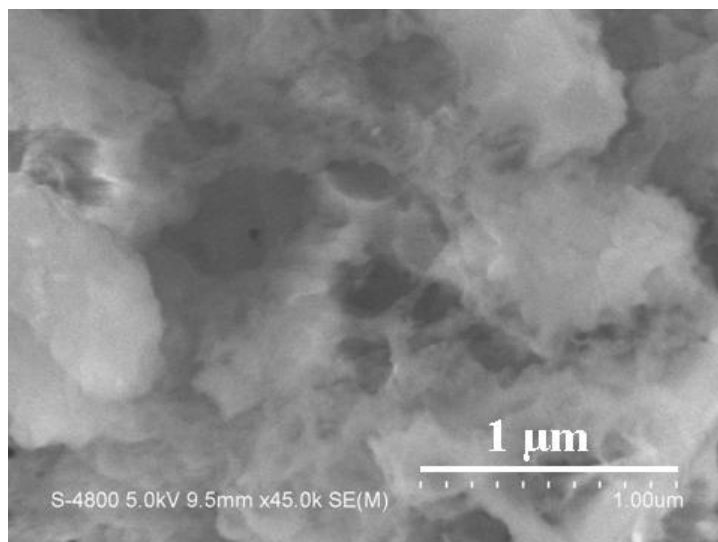

Fig. S4 SEM image of the MMIPs/AuE prepared by 125 mV/s during the electropolymerization process.
